# Supplementary material for: Individual consistency in the behaviors of newly-settled reef fish
Source: PeerJ journal article supplement (doi:10.7717/peerj.961), 2015-05-14

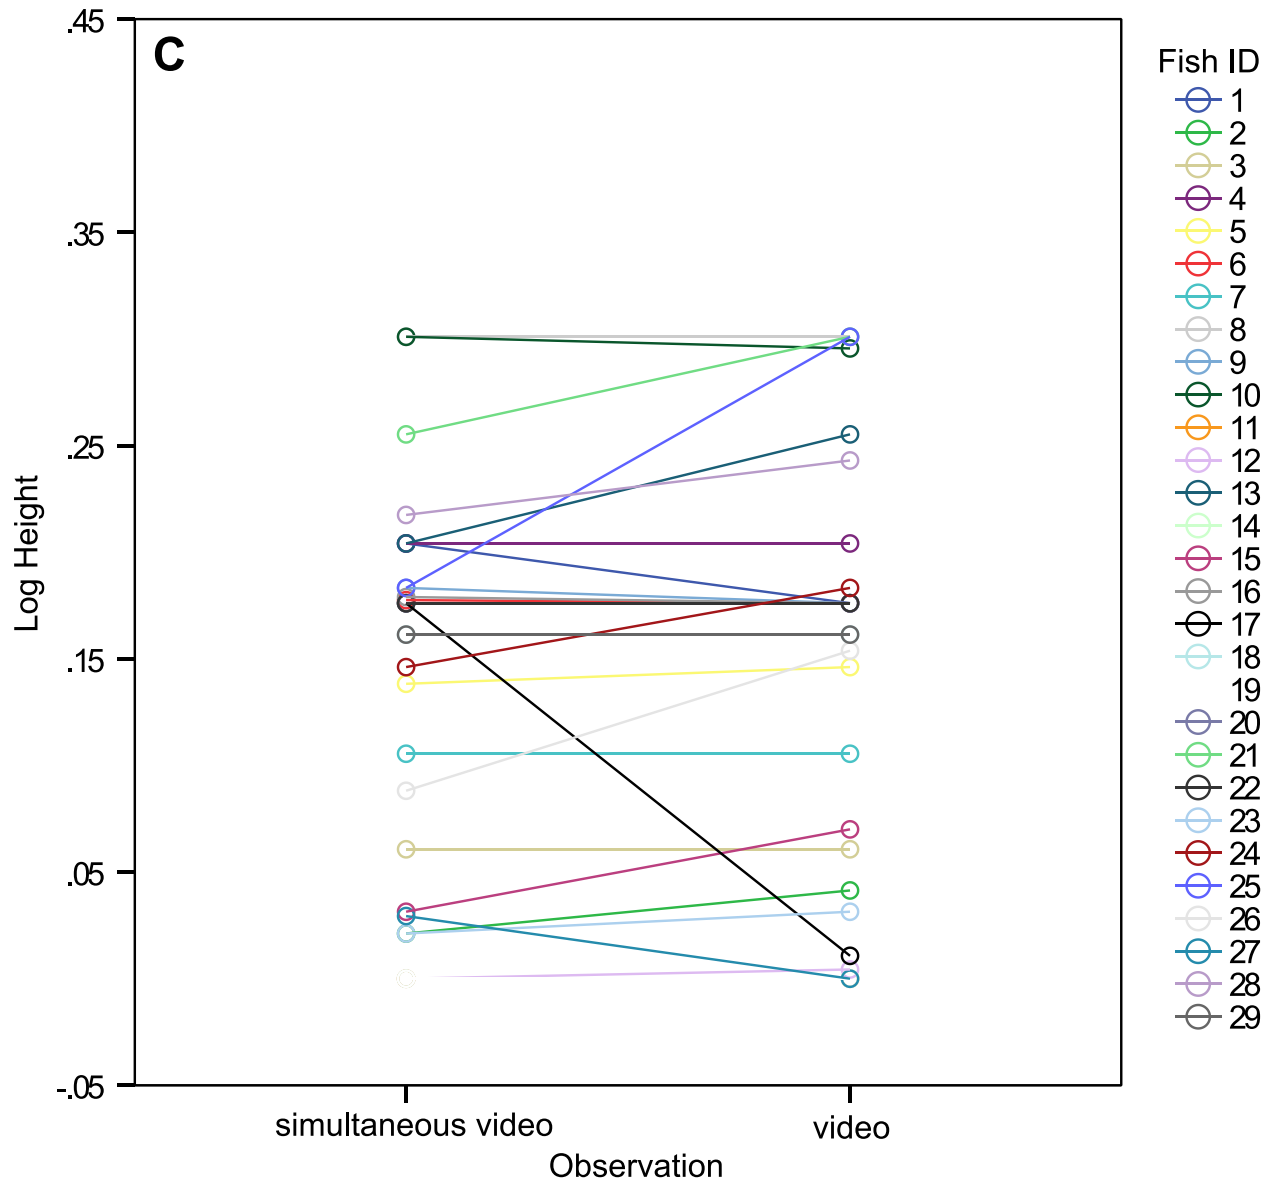

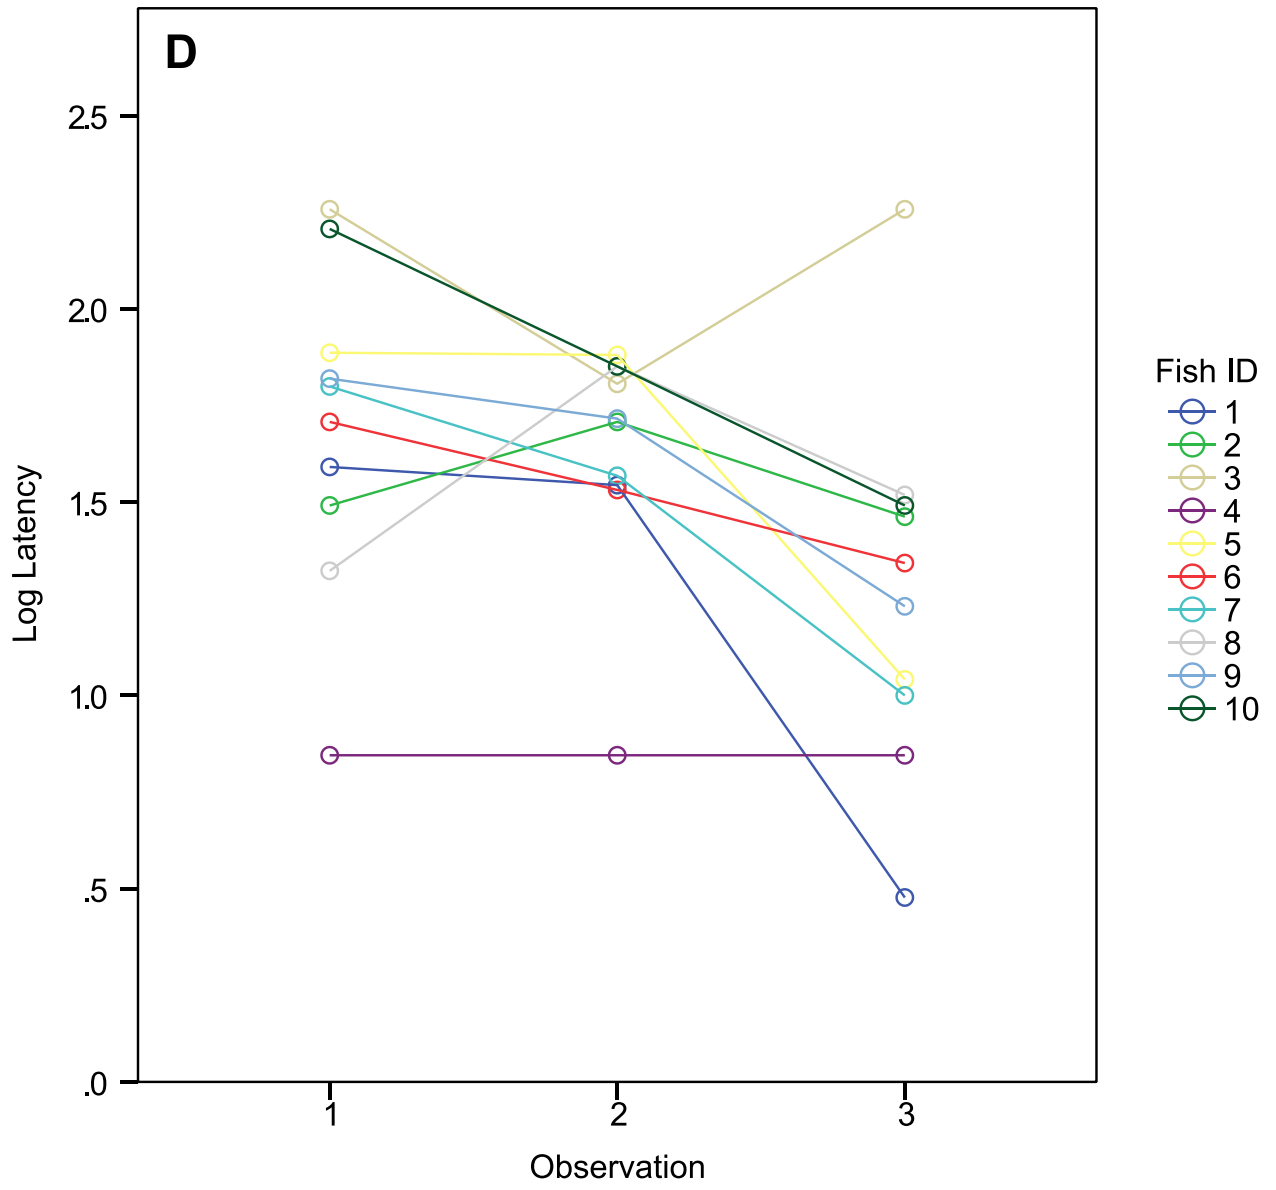

Supplement: Supplementary_figures.pdf [file Supplementary_figures.pdf]
